# Supplementary material
Source: PubMed Central journal article supplement (PMC3737721)
Supplement: supp_140.16.3403_DEV095307.pdf [file supp_140.16.3403_DEV095307.pdf]

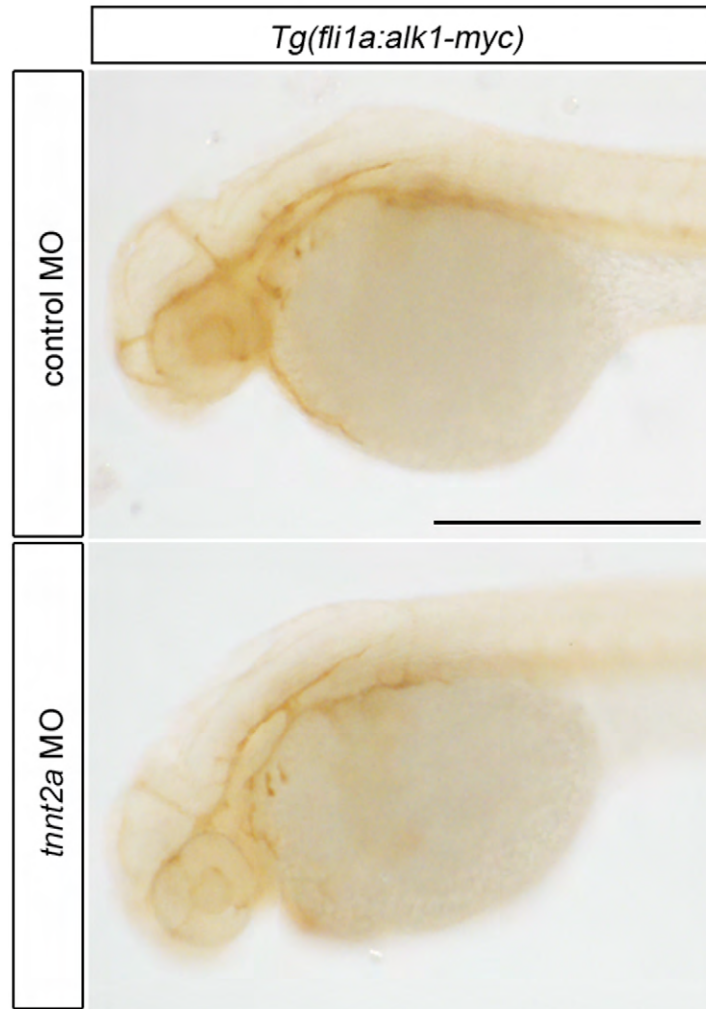

**Fig. S1. *Tg(fli1a:alk1-myc)* embryos express Alk1-myc in all endothelial cells in the presence or absence of flow.** Immunohistochemistry for myc in 36 hpf *Tg(fli1a:alk1-myc)* control and *tnnt2a* morphant embryos. Scale bar: 500  $\mu$ m.

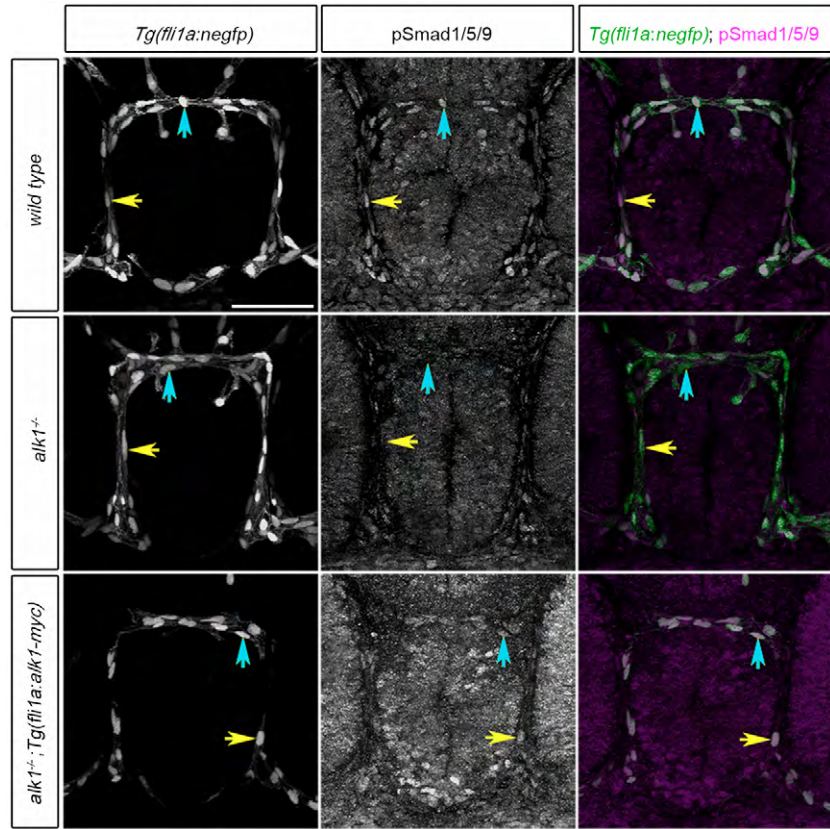

**Fig. S2. pSmad1/5/9 expression in *alk1*-positive endothelial cells depends on *alk1*.** pSmad1/5/9 expression (middle column) in endothelial cells (nuclei marked by *fli1a:negfp* transgene, left column) in wild-type, *alk1<sup>-/-</sup>* and *alk1<sup>-/-</sup>; Tg(fli1a:alk1-myc)* embryos at 36 hpf. In merge, EGFP-expressing endothelial cell nuclei are green, pSmad1/5/9 immunofluorescence is magenta. Yellow and blue arrows indicate endothelial cells in the CaDI and BCA, respectively. 2D confocal projections of 50  $\mu$ m frontal sections, dorsal upwards. Scale bar: 50  $\mu$ m. See Table S1 for fluorescence quantitation.

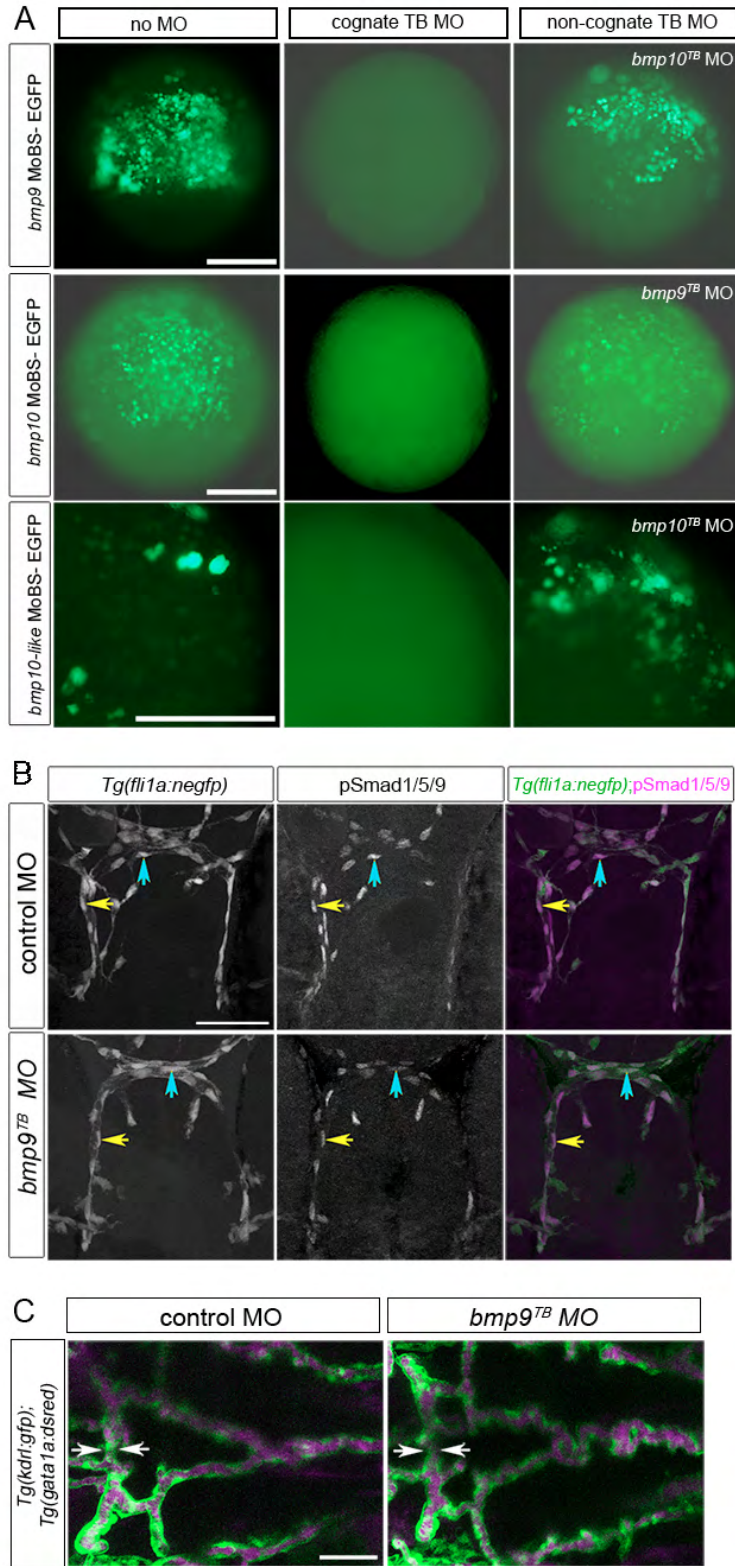

**Fig. S3. *bmp9* knockdown does not phenocopy zebrafish *alk1*<sup>-/-</sup> mutants.** (A) Translation blocking (TB) morpholino validations. Wild-type embryos injected at the one-cell stage with 50 pg CMV-driven EGFP constructs modified with morpholino-binding sites (MoBS) inserted upstream of the ATG, with or without cognate or non-cognate morpholinos. *bmp9*<sup>TB</sup> MO, 7 ng; *bmp10*<sup>TB</sup> MO, 20 ng; *bmp10-like* MO, 3 ng. Embryos were observed at ~6 hpf for EGFP fluorescence. Scale bar: 500  $\mu$ m (top two rows) or 250  $\mu$ m (bottom row). (B) pSmad1/5/9 expression (middle column) in endothelial cells (nuclei marked by *fli1a:negfp* transgene, left column) in 36 hpf embryos injected with 7 ng control or *bmp9*<sup>TB</sup> morpholino. Higher amounts of this morpholino were overtly toxic. In merge (right column), EGFP-expressing endothelial cell nuclei are green, pSmad1/5/9 immunofluorescence is magenta. Yellow and blue arrows indicate endothelial cells in the CaDI and BCA, respectively. 2D confocal projections of 50  $\mu$ m frontal sections, dorsal upwards. Scale bar: 50  $\mu$ m. See Table S1 for fluorescence quantitation. (C) Cranial vasculature in 48 hpf *Tg(kdrl:gfp);Tg(gata1a:dsRed)* embryos injected with 7 ng control or *bmp9*<sup>TB</sup> morpholino. Arrows highlight width of BCA. Endothelial cells are green, red blood cells are magenta. 2D confocal projections, dorsal views, anterior leftwards. Scale bar: 50  $\mu$ m. *n*=207 over five experiments.

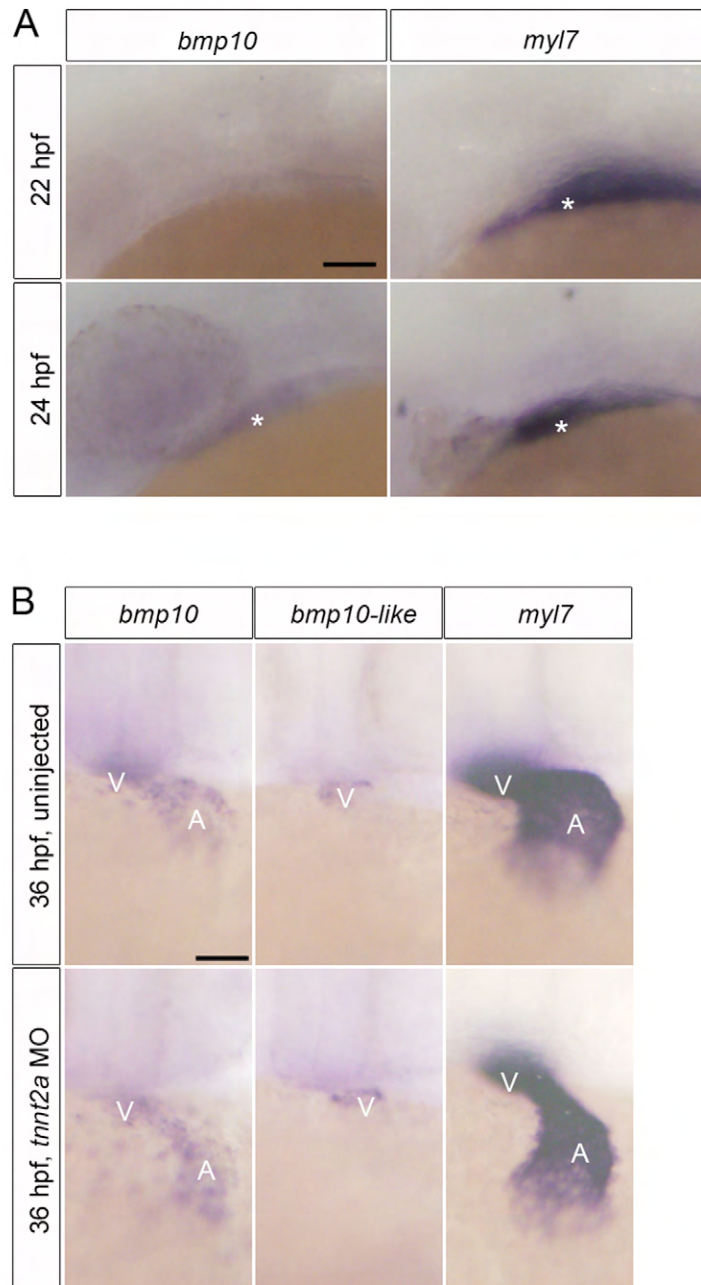

**Fig. S4. Expression of *bmp10* and *bmp10-like* mRNA does not depend on heartbeat.** (A) *bmp10* is not expressed at 22 hpf but is faintly expressed in the heart at 24 hpf. Lateral views, anterior leftwards. Scale bar: 100  $\mu$ m. Asterisk indicates developing heart. (B) *bmp10* and *bmp10-like* expression in control and *tnnt2a* morphants, which lack heartbeat. Images are representative of  $n=60$  embryos per group. A, atrium; V, ventricle. Ventral views, anterior upwards. Scale bar: 50  $\mu$ m. *myl7* is shown as a pan-myocardial control.

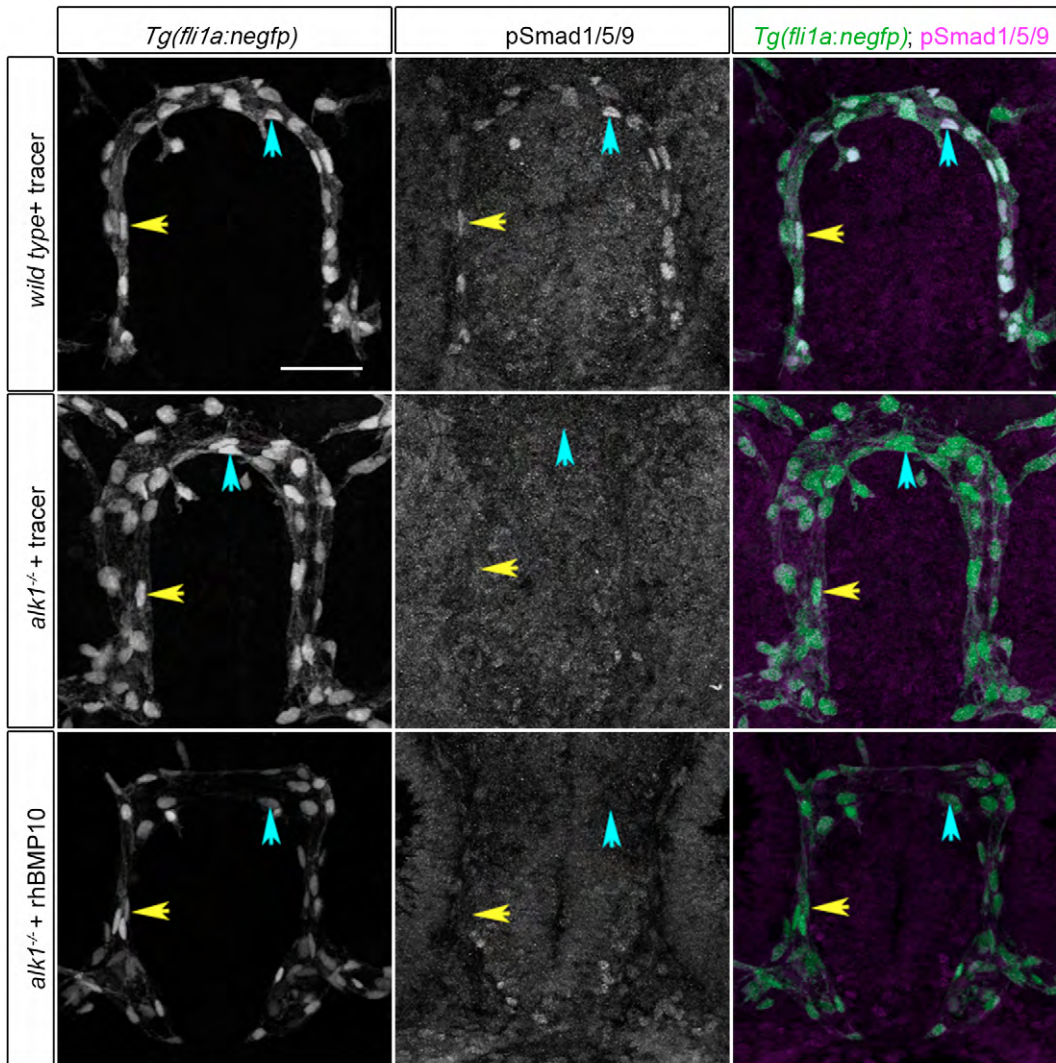

**Fig. S5. rhBMP10 cannot induce pSmad1/5/9 in the absence of *alk1*.** Intravascular injections of tracer alone or tracer + 2 nl 10  $\mu$ M rhBMP10 were performed at 28 hpf into wild-type or *alk1* mutant embryos. Images show pSmad1/5/9 expression (middle column) in endothelial cells (nuclei marked by *fli1a:nEGFP* transgene, left column) at 36 hpf. In merge (right column), EGFP-expressing endothelial cell nuclei are green, pSmad1/5/9 immunofluorescence is magenta. Yellow and blue arrows indicate endothelial cells in the CaDI and BCA, respectively. 2D confocal projections of 50  $\mu$ m frontal sections, dorsal upwards. Scale bar: 50  $\mu$ m. See Table S1 for fluorescence quantitation.

**Table S1. Quantitation of average nuclear phospho-Smad1/5/9 intensity**

| Corresponding figure | Sample                                                             | Average nuclear pSmad1/5/9 intensity (% of control) | <i>n</i> |
|----------------------|--------------------------------------------------------------------|-----------------------------------------------------|----------|
| Fig. 2               | Wild type, 24 hpf                                                  | 23.4±3.9***                                         | 6        |
|                      | <i>tnnt2a</i> MO, 36 hpf                                           | 49.9±8.0***                                         | 7        |
|                      | <b>Uninjected control, 36 hpf</b>                                  | <b>100±8.0</b>                                      | 7        |
|                      | <i>tnnt2a</i> MO;<br><i>Tg(fli1a:alk1-myc)</i> , 36 hpf            | 43.6±7.3***                                         | 7        |
|                      | <i>Tg(fli1a:alk1<sup>CA</sup>-mCherry)</i> , 36 hpf                | 164.9±25*                                           | 6        |
| Fig. 3C, Fig. S3B    | <b>Control MO, 36 hpf</b>                                          | <b>100±8.1</b>                                      | 11       |
|                      | Bmp10 MO, 36 hpf                                                   | 52±5.5***                                           | 10       |
|                      | Bmp9 MO, 36 hpf                                                    | 118.6±25                                            | 6        |
| Fig. 5B              | <b><i>tnnt2a</i> MO;<i>Tg(fli1a:alk1-myc)</i> + tracer, 36 hpf</b> | <b>100±3.5</b>                                      | 7        |
|                      | <i>tnnt2a</i> MO + rhBMP10, 36 hpf                                 | 75.7±4.4                                            | 6        |
|                      | <i>tnnt2a</i> MO;<br><i>Tg(fli1a:alk1-myc)</i> + rhBMP10, 36 hpf   | 317±27.7**                                          | 8        |
| Fig. S2              | <b>Wild type, 36 hpf</b>                                           | <b>100±10.2</b>                                     | 14       |
|                      | <i>alk1<sup>-/-</sup></i> , 36 hpf                                 | 48.5±6.4***                                         | 13       |
|                      | <i>alk1<sup>-/-</sup>;Tg(fli1a:alk1-myc)</i> , 36 hpf              | 120.9±10.2                                          | 7        |
| Fig. S5              | <b>Wild type + tracer, 36 hpf</b>                                  | <b>100±5.5</b>                                      | 4        |
|                      | <i>alk1<sup>-/-</sup></i> + tracer, 36 hpf                         | 40.9±4.5**                                          | 4        |
|                      | <i>alk1<sup>-/-</sup></i> + rhBMP10, 36 hpf                        | 32.8±5.7**                                          | 4        |

Controls for each experiment were normalized to 100% and are in bold. Values are mean±s.e.m. \**P*<0.05; \*\**P*<0.01; \*\*\**P*<0.001.
